# Supplementary material
Source: Springer Nature journal article supplement (https://www.springermedizin.de/resource/supplementary/12982_2012_109_MOESM2_ESM.pdf/9604206)

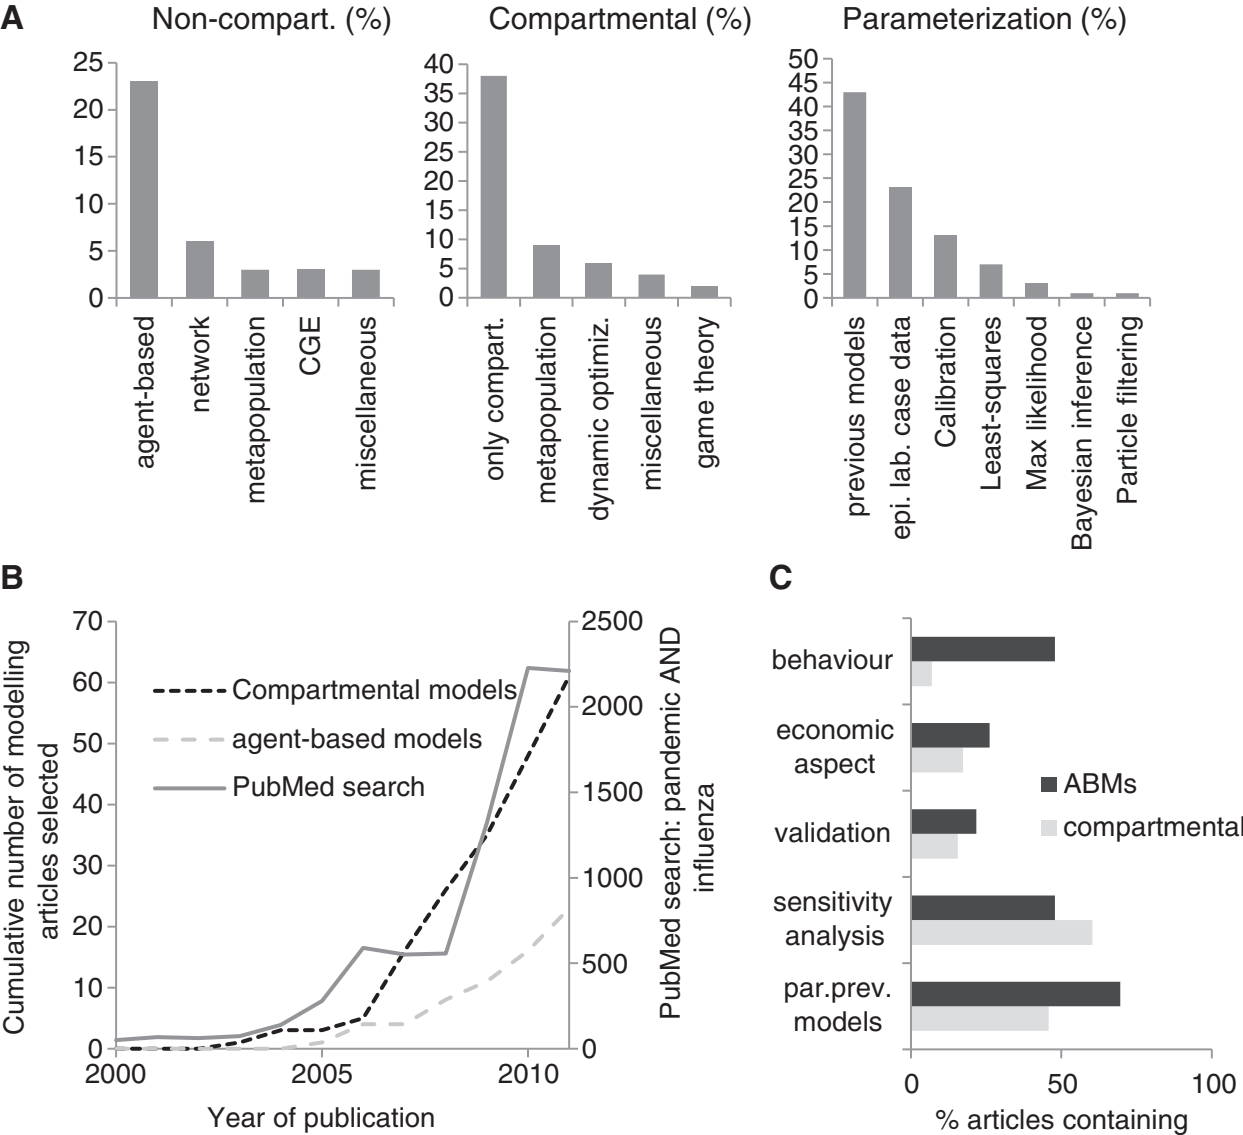

Supplement: MOESM2 [file 9604206]
